# Supplementary material for: Genome editing-mediated knock-in of therapeutic genes ameliorates the disease phenotype in a model of hemophilia
Source: PubMed Central journal article supplement (PMC9403902; doi:10.1016/j.omtn.2022.08.002), 2022-08-04
Supplement: mmc1.pdf [file mmc1.pdf]

OMTN, Volume 29

## **Supplemental information**

### **Genome editing-mediated knock-in of therapeutic genes ameliorates the disease phenotype in a model of hemophilia**

**Jeong Hyeon Lee, Hye-Kyung Oh, Beom Seok Choi, Ho Hyeon Lee, Kyu Jun Lee, Un Gi Kim, Jina Lee, Hyerim Lee, Geon Seong Lee, Se Jun Ahn, Jeong Pil Han, Seokjoong Kim, Su Cheong Yeom, and Dong Woo Song**

## Supplementary figures

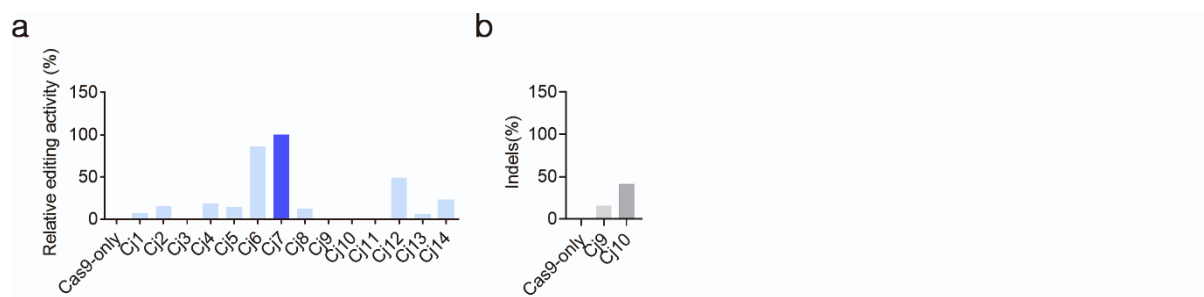

**Figure S1. Screening of sgRNAs targeting the *APOC3* or *HP* gene in human cells. (a, b)** Indel frequencies induced by the tested sgRNAs targeting intron 1 of *APOC3* (a) and *HP1* (b). In screening for the *HP* gene, 10 sgRNAs were initially tested, and two sgRNAs effective in T7E1 assays (data not shown) were further analyzed by targeted deep sequencing (b).

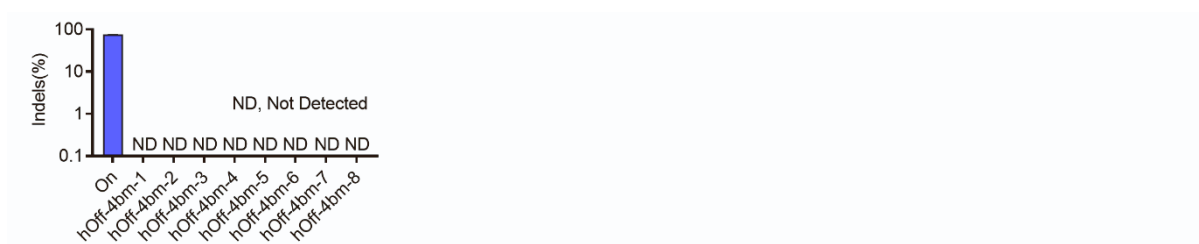

**Figure S2. Off-target analysis of in silico-based candidates of TS-APOC3.** Targeted deep sequencing results for the eight most homologous sites that differed by four nucleotides from the TS-APOC3 site. 4bm, 4 base mismatches. The indel frequency was measured in HEK293 cells, and the on-target indel frequency was  $76.6\% \pm 0.9\%$ .

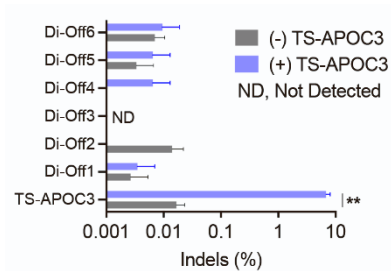

**Figure S3. Off-target analysis of TS-APOC3 in hepatocyte-like cells.** Targeted deep sequencing results for the off-target candidates obtained by Digenome-seq in TS-APOC3-treated Hep G2 cells. (n = 3). Results presented are the means  $\pm$  standard errors obtained from three independent experiments; statistical analysis was performed using Student's t-test. \*\* $p < 0.01$

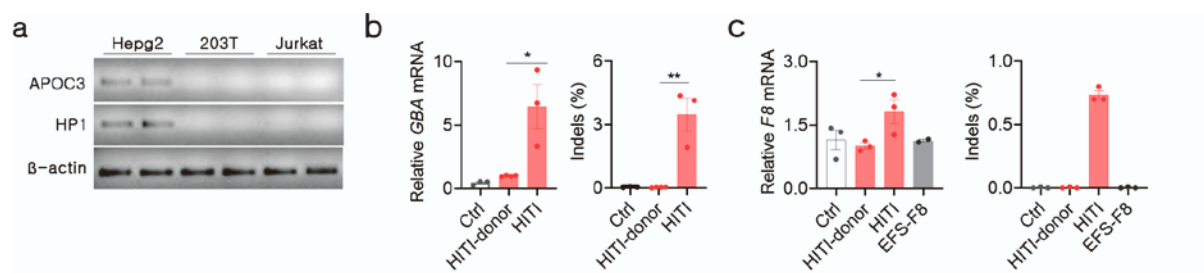

**Figure S4. Expression of therapeutic proteins in Hep G2 cells. (a)** RT-PCR results showing *APOC3* mRNA expression in Hep G2 cells. **(b)** *GBA* mRNA expression (left panel) and indel frequency (right panel) in HepG2 cells transfected with HITI donor in the absence or presence of the plasmid expressing CjCas9 and TS-*APOC3* ( $n = 3$ ). **(c)** *F8* mRNA expression (left panel) and indel frequency (right panel) using the same strategy ( $n = 3$ ). Ctrl: untransfected cells. Statistical analysis was performed using Student's t-test. \* $p < 0.05$ .

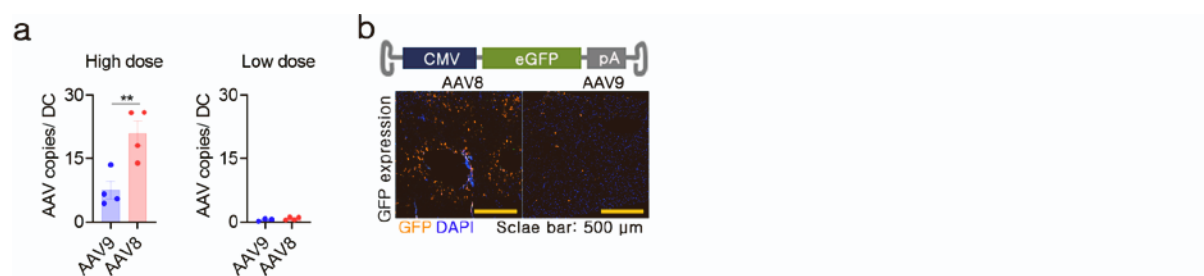

**Figure S5. Comparison of AAV serotypes for in vivo delivery. (a)** Quantification of AAV genome copy numbers per diploid cell in livers 6 weeks after injection of AAV8 and AAV9 delivering CjCas9 and sgRNA targeting mROSA ( $n = 3-4$ ). Low dose,  $1 \times 10^{12}$  vg/kg; High dose,  $1 \times 10^{13}$  vg/kg. **(b)** Immunofluorescence images from liver sections 3 weeks after injection of AAV8 and AAV9 delivering CMV-EGFP.  $1 \times 10^{12}$  vg/kg AAVs was transduced via the tail vein. Statistical analysis was performed using Student's t-test.  $**p < 0.01$ .

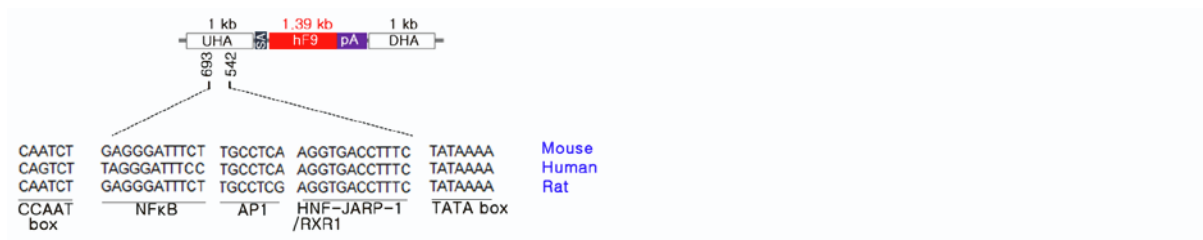

**Figure S6. Promoter sequences of the upstream homology arm of the HR donor for TS-APOC3.**

Schematic drawing of the HR donor for TS-APOC3 and potential sequences for the transcription of hF9. TATA box, CCAAT-box, and some transcription binding sites were located in the UHR, and the potentially critical sequences were well conserved among humans and rodents. UHR, upstream homology arm; DHR, downstream homology arm; SA, splicing acceptor; pA, bovine growth hormone polyadenylation signal. The numbers displayed below the UHR indicate the location from the start of the homology arm.

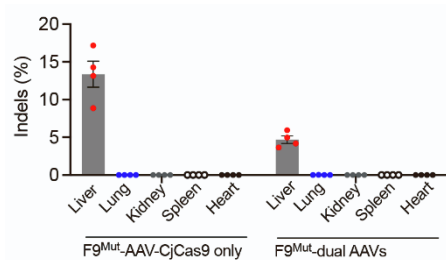

**Figure S7. Biodistribution of on-target editing in the diseased mouse treated with AAVs.** Targeted deep sequencing results for the TS-APOC3 on-target editing on the loci of liver, lung, kidney, spleen, and heart of the F9<sup>Mut</sup> mouse treated with AAV-CjCas9 only or dual AAVs for AAV-trap (n = 4).



## Supplementary tables

**Table S1.** On-target or Off-target sites tested in this study.

Red, mismatched nucleotides to the corresponding on-target sites; Blue, PAM sequences

| Target sites                | Target sequence with PAM (5'-3') |
|-----------------------------|----------------------------------|
| hAPOC3 On-target (TS-APOC3) | GAGAGGGCCAGAAATCACCCAAAGACACAC   |
| hAPOC3-di-off 1             | GAGAGGGCAGGAAATCACCCAAAGGTCACAC  |
| hAPOC3-di-off 2             | GAAGGGTTTAGAAATCACCCAAATCCACAT   |
| hAPOC3-di-off 3             | TGAAGAAAGAGAAATCACCCAAATTCACAT   |
| hAPOC3-di-off 4             | TAGCCTAATAGAAATCACCCAAATTGACAC   |
| hAPOC3-di-off 5             | AGAATTTAAAGAAATCACCCAAGAGCACAC   |
| hAPOC3-di-off 6             | AGGATCAGCAGAAATCACCCAACCTAGTAC   |
| hHP1 On-target (TS-HP)      | CATTGAGAAAGTACATTGGCAATAATAC     |
| hHP1-di-off 1               | AGGCAGGAAAAATACATTGGCAAAAACAT    |
| hHP1-di-off 2               | ATTTGCGGAAAG-ACATTGGCTTTAGTAC    |
| hHP1-di-off 3               | CTAGATTAATGTACATTGGCCAAAACAT     |
| hHP1-di-off 4               | CACTCCAGAAAGTAC-TTGGCTGCCACAC    |
| hHP1-di-off 5               | TGCTATTGTAAATACATTGGCCTGTACAC    |
| hHP1-di-off 6               | TTTGGGGGAAAGTACA-TGGCATAAACAC    |
| hHP1-di-off 7               | TGTTGAAGAATGTACATTGTCTCACACAC    |
| hHP1-di-off 8               | TGTTGAAGAATGTACATTGTGCGCACACAC   |
| hHP1-di-off 9               | TTGGGGAGAAAG-ACATTGGCATTACACAC   |
| hHP1-di-off 10              | AGAGAAGAGAGTACATTGGCGAAGATAC     |
| hAPOC3-off 1                | GAGAGGTTAAGAAACCACCCAATGTCTCGCAC |
| hAPOC3-off 2                | GAGAGGTACAGAAATCACACACAACATAC    |
| hAPOC3-off 3                | CAGGGGCCAGACATCACCCAACCTTTGTAC   |
| hAPOC3-off 4                | GAGAGGGCCAGACTTTGCCCAAGGTCACAC   |
| hAPOC3-off 5                | GTAAGGGCCAGAATTACCCAAGAAACAC     |
| hAPOC3-off 6                | GAGGGGGCAGGAAACCACCCAAGAGCACAC   |
| hAPOC3-off 7                | GAGAGGGTAAGAAACCACCCATGACCACAC   |
| hAPOC3-off 8                | GAGAGGGCAGGAATTTACCCAAGGTCACAC   |
| mAPOC3-off 1                | GGAAGGCCAGAAATCACtCAAGAAAGTAC    |
| mAPOC3-off 2                | GAGAGGGTCATACATTACCCAAGGCCACAC   |
| mAPOC3-off 3                | AAGATGGCCAGAATTCACtCAAGGGGACAC   |

|              |                                |
|--------------|--------------------------------|
| mAPOC3-off 4 | GAGAGGCTAAGAAATCACCTAAGGTCACAC |
| mAPOC3-off 5 | GAGAGGCCAGGAATTACCCACCCGGGTAC  |
| hAPOC3-Cj1   | CCAGCCCAGCCAGCAAGCCTGGAGAAGCAC |
| hAPOC3-Cj2   | CTTCAGGTTATGATGAGGGGTGGGGGCAC  |
| hAPOC3-Cj3   | GGGAGGGGTGTCACTTGCCCAAAGCTACAC |
| hAPOC3-Cj4   | ACCCCTGTGTAGCTTTGGGCAAGTGACAC  |
| hAPOC3-Cj5   | AAGCCTGAAGAATGAGGGGGGAACCTGCAC |
| hAPOC3-Cj6   | TGGAGAGGGCCAGAAATCACCCAAAGACAC |
| hAPOC3-Cj7   | GAGAGGGCCAGAAATCACCCAAAGACACAC |
| hAPOC3-Cj8   | GAAAACCCACCAGACTGAACATCAAGGCAC |
| hAPOC3-Cj9   | AAGGAGTAGGGGCCGGCTCCCTGCTAATAC |
| hAPOC3-Cj10  | TGGGGACCTGGGGTGCCCCTCACAGGACAC |
| hAPOC3-Cj11  | TCCTGCAAGGAAGTGTCTGTGAGGGGCAC  |
| hAPOC3-Cj12  | GGAACAGAGGTGCCATGCAGCCCCGGGTAC |
| hAPOC3-Cj13  | CAACAAGGAGTACCCGGGGCTGCATGGCAC |
| hAPOC3-Cj14  | GAGCGCCAGGAGGGCAACAACAAGGAGTAC |
| hHP-Cj9      | TCCAGGAAAGAGAAACCTCCCTCAGACAC  |
| hHP-Cj10     | CATTCAGGAAAGTACATTGGCAATAATAC  |

**Table S2.** Sequences for the mouse APOC3 target sites and ssODN used in generation of the humanized mouse

Red, PAM sequence of SpCas9 (NGG) or CjCas9 (NNNNRYAC); Blue, homology arm sequence

|                         |                                                                                                                                                                                                                    |
|-------------------------|--------------------------------------------------------------------------------------------------------------------------------------------------------------------------------------------------------------------|
| Mouse APOC3 target site | ACCCAGCCCCCAAGTGGGGTGG<br>AGCCCCCAAGTGGGGTGGAGG                                                                                                                                                                    |
| ssODN(5' - 3')          | GTCCCGTTCTGCAGAGTATTTCTATACTCCACCTCCACCCAGGTTCCCCC<br>TCATTCTTCAGGCTTAGGGCTGGAGGAAGCCTTAGACAGCCCAGTCCTACC<br>CCAGACAGGGAAACTGAGGCCTGGAGAGGGCCAGAAATCACCCAAAGACA<br>CACAGCACCACTTGGGGGGCTGGGTCTACTGTAGTTCTCTATCTAAT |

**Table S3.** Biodistribution for on- and off-targeting genes in disease mouse treated with AAVs

| Group                              | Tissue | Target | Mean Indels (%) | STDEV (%) |
|------------------------------------|--------|--------|-----------------|-----------|
| F9 <sup>Mut</sup> -AAV-CjCas9 only | Liver  | On     | 13.36           | 2.99      |
|                                    |        | mOff-1 | 0               | 0         |
|                                    |        | mOff-2 | 0.01            | 0.01      |
|                                    |        | mOff-3 | 0               | 0         |
|                                    |        | mOff-4 | 0.01            | 0         |
|                                    |        | mOff-5 | 0.01            | 0         |
|                                    | Lung   | On     | 0               | 0         |
|                                    |        | mOff-1 | 0               | 0         |
|                                    |        | mOff-2 | 0.01            | 0         |
|                                    |        | mOff-3 | 0               | 0         |
|                                    |        | mOff-4 | 0.01            | 0         |
|                                    |        | mOff-5 | 0.01            | 0         |
|                                    | Kidney | On     | 0.01            | 0.01      |
|                                    |        | mOff-1 | 0               | 0         |
|                                    |        | mOff-2 | 0.02            | 0.01      |
|                                    |        | mOff-3 | 0               | 0         |
|                                    |        | mOff-4 | 0.01            | 0         |
|                                    |        | mOff-5 | 0.01            | 0         |
|                                    | Spleen | On     | 0.01            | 0         |
|                                    |        | mOff-1 | 0               | 0         |
|                                    |        | mOff-2 | 0.02            | 0         |
|                                    |        | mOff-3 | 0               | 0         |
|                                    |        | mOff-4 | 0.01            | 0         |
|                                    |        | mOff-5 | 0.01            | 0.01      |
| Heart                              | On     | 0      | 0               |           |
|                                    | mOff-1 | 0      | 0               |           |
|                                    | mOff-2 | 0.01   | 0               |           |
|                                    | mOff-3 | 0      | 0               |           |
|                                    | mOff-4 | 0.01   | 0               |           |
|                                    | mOff-5 | 0.01   | 0.01            |           |
| F9 <sup>Mut</sup> -dual AAVs       | Liver  | On     | 4.69            | 0.86      |
|                                    |        | mOff-1 | 0               | 0         |
|                                    |        | mOff-2 | 0.01            | 0.01      |
|                                    |        | mOff-3 | 0               | 0.01      |
|                                    |        | mOff-4 | 0.01            | 0.01      |

|        |        |        |      |      |
|--------|--------|--------|------|------|
|        |        | mOff-5 | 0.02 | 0.01 |
|        | Lung   | On     | 0.02 | 0.01 |
|        |        | mOff-1 | 0    | 0    |
|        |        | mOff-2 | 0.02 | 0.01 |
|        |        | mOff-3 | 0    | 0    |
|        |        | mOff-4 | 0.01 | 0.01 |
|        |        | mOff-5 | 0.02 | 0.01 |
|        | Kidney | On     | 0.01 | 0.01 |
|        |        | mOff-1 | 0    | 0    |
|        |        | mOff-2 | 0.01 | 0.01 |
|        |        | mOff-3 | 0    | 0    |
|        |        | mOff-4 | 0.01 | 0.01 |
|        |        | mOff-5 | 0.02 | 0.01 |
|        | Spleen | On     | 0.01 | 0    |
|        |        | mOff-1 | 0    | 0    |
|        |        | mOff-2 | 0.01 | 0    |
|        |        | mOff-3 | 0    | 0    |
|        |        | mOff-4 | 0.01 | 0.01 |
|        |        | mOff-5 | 0.02 | 0.01 |
|        | Heart  | On     | 0.01 | 0    |
|        |        | mOff-1 | 0    | 0    |
|        |        | mOff-2 | 0.01 | 0.01 |
|        |        | mOff-3 | 0    | 0    |
|        |        | mOff-4 | 0.01 | 0    |
| mOff-5 |        | 0.02   | 0.01 |      |

**Table S4.** Primer sequences used in targeted deep-sequencing

| Target sites           | Primer Sequence (5'-3')                           | Product size |
|------------------------|---------------------------------------------------|--------------|
| hAPOC3 on-target       | F: AAGTGGCTCCAAGTGCAG<br>R: ATCGAGGCCCAAAGGGAG    | 238bp        |
| hAPOC3 di-off-target 1 | F: AGGGTTAGGTGAGATGG<br>R: AGGGAGCTACTGAAGAAC     | 235bp        |
| hAPOC3 di-off-target 2 | F: ACAATGAGCTTTGTGGTG<br>R: AGAGTGAGACTCTTTCTC    | 258bp        |
| hAPOC3 di-off-target 3 | F: AGCTACATTTTACACCTTC<br>R: TTTTCCAAGGCAGATGTG   | 212bp        |
| hAPOC3 di-off-target 4 | F: TGGACTTTTGCACGACTG<br>R: ACAGTCAAATGGAAGTAC    | 246bp        |
| hAPOC3 di-off-target 5 | F: ATGAATGTTCCGAGTAAC<br>R: ATGCACCCATTATTGTGC    | 269bp        |
| hAPOC3 di-off-target 6 | F: TAACCGAGATGCTCAGAG<br>R: TGGAGTCAGGAGGTACG     | 247bp        |
| hHP1 On-target         | F: TATCAAGAAGTAGAGGAATAGC<br>R: TCCTGCTGGGAATTCTG | 227bp        |
| hHP1 di-off-target 1   | F: TTGTGTAACGTGCTGTAC<br>R: TTAGTGGAGAACTTGCTG    | 263bp        |
| hHP1 di-off-target 2   | F: TCCTACAGTTGAAATTGC<br>R: ACCACTACAGTCTGGAAC    | 242bp        |
| hHP1 di-off-target 3   | F: TGTGCATGTGTTACTC<br>R: AATTCAGCAGACATGATG      | 259bp        |
| hHP1 di-off-target 4   | F: TTAGCACTTAGCACCATG<br>R: TCAGACCAGTTGAGACTG    | 231bp        |
| hHP1 di-off-target 5   | F: ATCAGAGGTCTGTCATTC<br>R: TTTCCAAATTGCCTCATC    | 189bp        |
| hHP1 di-off-target 6   | F: TCTGTTCAGTCTGCTAG<br>R: ATCCAGCACTTTGAGAG      | 254bp        |
| hHP1 di-off-target 7   | F: AGTGCTGGAATTAGAGGTG<br>R: AGACAACAGCAATGGATG   | 238bp        |
| hHP1 di-off-target 8   | F: AAGTGATCCTCTCACTTC<br>R: ACCAAGAGAATCGAACTG    | 282bp        |
| hHP1 di-off-target 9   | F: ACTTTCCATGGACAAAGTC<br>R: TGACATTCCGAACTGATG   | 231bp        |

|                       |                                                          |       |
|-----------------------|----------------------------------------------------------|-------|
| hHP1 di-off-target 10 | F: TCCTTCAAGGAGTTCGTG<br>R: TCTCCAACATGATTGTGC           | 267bp |
| hAPOC3 off-target 1   | F: GCTAGAGTGCCTGGATTTGG<br>R: TCTTACAATCTGCCAAATGACC     | 201bp |
| hAPOC3 off-target 2   | F: AACACCTGTCACACACACTTCA<br>R: CTCAGGGAAGACCCAGGAGT     | 281bp |
| hAPOC3 off-target 3   | F: GACAGTGGAAACCCCTTTCCT<br>R: CCTGAGGCTACCACTTGGAT      | 277bp |
| hAPOC3 off-target 4   | F: ATCTCTGGTTGGAGGCATTG<br>R: AGGCAGGGATTCAGGAAACT       | 249bp |
| hAPOC3 off-target 5   | F: GGCTTTCCTATGCACAAAA<br>R: TGCAAGGACGATGTCAAAG         | 250bp |
| hAPOC3 off-target 6   | F: TGGGAGAAAGGGATCTGATG<br>R:<br>TCCCTTTGCTGTTTAGATAGCTG | 291bp |
| hAPOC3 off-target 7   | F: GGAATGTCCTGGAACAGTGG<br>R: TTGTCTTGCTGCTTTCATGG       | 265bp |
| hAPOC3 off-target 8   | F: AAGCTGTTTCCACAGCACCT<br>R: TCAAGTCCAACATGCATCCAC      | 207bp |
| mAPOC3 off-target 1   | F: GGATGGGGGACTTTTGGTA<br>R: AACCACATGCCTCTGTCTCC        | 251bp |
| mAPOC3 off-target 2   | F: AGGTAAAGTCAGGGCGGTCT<br>R: TGTGTACCACGTGCCATTTT       | 248bp |
| mAPOC3 off-target 3   | F: CTGGTCCATCCTCCATCTGT<br>R: CCAGCCTTGAAGATTGATGC       | 200bp |
| mAPOC3 off-target 4   | F: CCCTGCTATCCCAGGAGAC<br>R: CGAATCGCTGCACAATTTTA        | 202bp |
| mAPOC3 off-target 5   | F: CGTTGTCAGTCCAGGAGGAT<br>R: CATTGACAGTGACCCACAC        | 240bp |

**Table S5.** Primer sequences used in q-RT PCR

| Target gene            | Primer Sequence (5'-3')                                | Product size | Primer bank ID |
|------------------------|--------------------------------------------------------|--------------|----------------|
| hGAPDH                 | F: GTCTCCTCTGACTTCAACAGCG<br>R: ACCACCCTGTTGCTGTAGCCAA | 131bp        |                |
| hF9-CDS                | F: CGAGAACGCCAACAAGATCCT<br>R: AGCTGCACTTCTCTTCCATGC   | 110bp        |                |
| hAPOC3-hF9-KI specific | F: CCTGCCTGTCTGCTCAGTTC<br>R: CTCGTGGTCCAGAAACACGG     | 148bp        |                |
| hF8 BDD                | F: GGGAGTCTGGCCAAGGAAAA<br>R: ATGCAGCATCCCTATCCTGC     | 127bp        |                |
| mF9                    | F: ATGCTGGTGCCAAGTTGGATT<br>R: CTCAGTGCAGGAACAAATTACCT | 130bp        | 387158a1       |
| mApoc3                 | F: TACAGGGCTACATGGAACAAGC<br>R: CAGGGATCTGAAGTGATTGTCC | 116bp        | 15421856a1     |
| mGBA                   | F: GTATGGCCTAAGATTCTGGGC<br>R: CTAGGTCACGGGAAATGAAGTC  | 128bp        | 118130967c3    |
| mGLA                   | F: TCTGTGAGCTTGCGCTTTGT<br>R: GCAGTCAAGGTTGCACATGAAA   | 137bp        | 7305089a1      |
| mHP                    | F: GCTATGTGGAGCACTTGGTTC<br>R: CACCCATTGCTTCTCGTCGTT   | 101bp        | 8850219a1      |
| mIDS                   | F: CGGCAGCTTAGCTTCAGCTT<br>R: GAGCATCTGTAGCAGAGTTGC    | 85bp         | 23268604a1     |
| mIDUA                  | F: GCTGACCAGTACGACCTTAGT<br>R: TACGGCACCTATGTAGGCAAG   | 60bp         | 6680349a1      |
